## **RTEL1 is required for silencing and epigenome stability**

Margaux Olivier<sup>1#</sup>, Amy Hesketh<sup>1#</sup>, Marie-Noëlle Pouch-Pélissier<sup>1</sup>, Thierry Pélissier<sup>1</sup>, Ying Huang<sup>2</sup>, David Latrasse<sup>2</sup>, Moussa Benhamed<sup>2,3,4</sup>, Olivier Mathieu<sup>1\*</sup>

<sup>1</sup> Institute of Genetics Reproduction and Development (iGReD), Université Clermont Auvergne, CNRS, Inserm, F-63000 Clermont-Ferrand, France.

<sup>2</sup> Institute of Plant Sciences Paris-Saclay (IPS2), CNRS, INRAE, Université d'Évry, F-91405 Orsay, France.

<sup>3</sup> Institute of Plant Sciences Paris-Saclay (IPS2), Université de Paris, F-75006 Paris, France.

<sup>4</sup> Institut Universitaire de France (IUF).

# Equal contribution

\* Corresponding author. Tel: 33 473 407 407, E-mail: [olivier.mathieu@uca.fr](mailto:olivier.mathieu@uca.fr)

### **Abstract**

Transcriptional silencing is an essential mechanism for controlling the expression of genes, transgenes and heterochromatic repeats through specific epigenetic marks on chromatin that are maintained during DNA replication. In Arabidopsis, silenced transgenes and heterochromatic sequences are typically associated with high levels of DNA methylation, while silenced genes are enriched in H3K27me3. Reactivation of these loci is often correlated with decreased levels of these repressive epigenetic marks. Here, we report that the DNA helicase REGULATOR OF TELOMERE ELONGATION 1 (RTEL1) is required for transcriptional silencing. RTEL1 deficiency causes upregulation of many genes enriched in H3K27me3 accompanied by a moderate decrease in this mark, but no loss of DNA methylation at reactivated heterochromatic loci. Instead, heterochromatin exhibits DNA hypermethylation and increased H3K27me3 in *rtell*. We further find that loss of RTEL1 suppresses the release of heterochromatin silencing caused by the absence of the MOM1 silencing factor. RTEL1 is conserved among eukaryotes and plays a key role in resolving DNA secondary structures during DNA replication. Inducing such aberrant DNA structures using DNA cross-linking agents also results in a loss of transcriptional silencing. These findings uncover unappreciated roles for RTEL1 in transcriptional silencing and in stabilizing DNA methylation and H3K27me3 patterns.

**Keywords:** RTEL1, silencing, replication, DNA methylation, H3K27me3, Arabidopsis

## Introduction

In eukaryotic cells, DNA is packaged with histone proteins to form a highly compacted and organized structure known as chromatin. Chromatin exists in two different main states: euchromatin, which is mainly composed of protein coding genes and sparsely condensed, and heterochromatin, which shows a high density of transposable elements and repetitive sequences and a higher level of condensation. By influencing DNA accessibility, chromatin structure largely influences various DNA-related biological processes, including transcription, DNA replication and DNA repair. The chromatin structure is also related to the presence of epigenetic marks, including various post-translational modifications of histone proteins and DNA methylation.

In *Arabidopsis thaliana*, DNA methylation of cytosine residues occurs in three sequence contexts: the symmetric CG and CHG contexts and the asymmetric CHH context (where H is any base but G) (Law & Jacobsen, 2010). Typically, heterochromatin sequences are transcriptionally silent and associated with high levels of DNA methylation at all three cytosine sequence contexts. In contrast, most constitutively active genes in euchromatin are either unmethylated or DNA methylated in their coding sequence specifically at CG sites (Tran *et al*, 2005; Zhang *et al*, 2006; Lister *et al*, 2008). On the other hand, genes with spatiotemporal expression are typically silenced in certain tissues or at certain developmental stages by histone H3 lysine 27 trimethylation (H3K27me3) deposited by Polycomb group (PcG) proteins (Bieluszewski *et al*, 2021; Xiao & Wagner, 2015).

DNA methylation is established *de novo* by the RNA-directed DNA methylation (RdDM) pathway and then maintained by specific pathways to each cytosine sequence context. CG sites are the most frequently and highly methylated, with maintenance dependent on METHYLTRANSFERASE 1 (MET1) that acts during DNA replication. CHROMOMETHYLASE 3 (CMT3) is the primary methyltransferase for CHG methylation maintenance. Methylation at CHH sites in heterochromatin is mainly maintained by CHROMOMETHYLASE 2 (CMT2), while DOMAINS REARRANGED METHYLTRANSFERASE 2 (DRM2) acting in the RdDM pathway methylates CHH positions in shorter, less heterochromatic sequences (Du *et al*, 2015; Law & Jacobsen, 2010). In the poorly accessible heterochromatin environment, DNA methylation depends on

Decrease in DNA Methylation 1 (DDM1) to overcome the linker histone H1 barrier and allow access to DNA for MET1, CMT2 and CMT3 (Zemach *et al*, 2013; Vongs *et al*, 1993).

Disruption of DNA methylation pathways, particularly CG methylation, leads to the reactivation of numerous transposable elements and some protein coding genes (Lister *et al*, 2008; Zhang *et al*, 2006; Mathieu *et al*, 2007). However, DNA methylation is not the sole mechanism which the cell relies on to secure transcriptional gene silencing. There is growing evidence that DNA methylation-independent pathways participate in robust silencing. Several key factors involved in these pathways have been identified, including MORPHEUS' MOLECULE 1 (MOM1), a protein that mediates silencing of various pericentromeric sequences (Amedeo *et al*, 2000; Steimer *et al*, 2000; Vaillant *et al*, 2006; Yokthongwattana *et al*, 2010), and members of the conserved *Microrchidia* (MORC) ATPase family, AtMORC1 and AtMORC6, which regulate silencing of several, mostly heterochromatic, TEs (Moissiard *et al*, 2012). The precise mechanisms by which these actors control silencing are not yet fully understood. There is evidence that MOM1 and AtMORC6 act in largely distinct pathways in controlling silencing of pericentromeric TEs, although MOM1 appears to recruit the RdDM machinery via MORC6 at some RdDM sites (Moissiard *et al*, 2014; Li *et al*, 2023). Transcriptional reactivation in *mom1* mutants requires the MED14 subunit of the MEDIATOR complex (Bourguet *et al*, 2018). More recently, we found that the MAINTENANCE OF MERISTEMS (MAIN) and MAIN-LIKE1 (MAIL1) proteins, which contain a transposon-related plant mobile domain, also control silencing of a set of pericentromeric TEs independently of DNA methylation through a molecular pathway distinct from those involving MOM1 and AtMORC6 (Ikeda *et al*, 2017).

During DNA replication, both heterochromatin and euchromatin are disrupted ahead of the replication fork and are then reassembled into their original epigenetic states behind the fork (Probst *et al*, 2009). Similarly, chromatin structure must be modulated during DNA repair to allow repair factors access to the DNA molecule, and subsequently restored to its original state to maintain transcriptional activity of the underlying sequences. Stalling of the replication fork leads to epigenetic instability and loss of silencing, suggesting that DNA unwinding, replication and chromatin re-formation must be tightly coordinated (Sarkies & Sale, 2012). Mutations in several factors involved in DNA replication and/or repair have been found to affect silencing, indicating a tight link between these processes. These factors include, among others, the DNA polymerases POL $\alpha$  (Liu *et al*, 2010), POL $\delta$  (Iglesias *et al*, 2015), POL $\epsilon$  (Bourguet *et al*, 2020; Yin *et al*, 2009), REPLICATION PROTEIN 2 (RPA2) (Elmayan *et al*, 2005), the nuclear protein BRUSHY1 (BRU1) (Takeda *et al*, 2004), the flap

endonuclease FEN1 (Zhang *et al*, 2016) and the chromatin assembly factor CAF-1 (Schönrock *et al*, 2006). Mutants with defects in these factors exhibit increased sensitivity to DNA damaging agents, indicating the accumulation of DNA damage and/or constitutive replication stress. Notably, release of silencing in these mutants is not associated with a loss of DNA methylation.

Here, we identify a role in silencing for *REGULATOR OF TELOMERE ELONGATION 1* (*RTEL1*) encoding a DNA helicase protein linked to DNA repair and replication. We show that *RTEL1* is required for the silencing of both a transgene and a set of endogenous loci independently of a loss of DNA methylation, and through a pathway likely related to its replication function. Additionally, we show that *RTEL1* is necessary from preventing a gain of H3K27me3 and DNA methylation in heterochromatin regions. Upregulated genes in *rtel1* show a moderate loss of H3K27me3, while heterochromatin regions gain H3K27me3 and DNA methylation. Moreover, our study indicates that *RTEL1* is required for the release of heterochromatin silencing in the absence of *MOM1*, and for viably in *pol2a* and *mail1* mutant backgrounds.

## Results

### Mutations in *RTEL1* release transcriptional silencing.

The *Arabidopsis* L5 line carries transcriptionally silent tandem repeats of a  $\beta$ -glucuronidase (*GUS*) transgene under control of the CaMV 35S promoter (Morel *et al*, 2000). We and others previously showed that silencing of the L5-*GUS* transgene is sensitive to mutations in a wide range of transcriptional silencing regulators (Bourguet *et al*, 2018; Ikeda *et al*, 2017; Bourguet *et al*, 2020; Elmayan *et al*, 2005; Takeda *et al*, 2004; Morel *et al*, 2000). We conducted a genetic screen on an ethyl methanesulfonate (EMS) mutagenized L5 population for mutants that reactivate the L5-*GUS* transgene independently of a loss of DNA methylation. We used *GUS* histochemical staining assay on isolated leaves and methylation-sensitive restriction enzyme digestion followed by PCR to select M2 plants with destabilized L5-*GUS* silencing and no loss of DNA methylation at the 5' end of the transgene *GUS* coding region. We identified six mutants, for which silencing release of the L5-*GUS* transgene followed a 1/3 ratio in the F2 progeny of backcrosses with L5, indicating that the causative mutations were single-locus nuclear recessive. Further mapping-by-sequencing of candidate mutations using outcross F2 populations identified new mutant alleles of *RPA2*, *MOM1*, *POLa2*, and two mutant alleles of *POL2A* already described (Figure S1) (Yin *et al*, 2009; Bourguet *et al*,

2020), validating our screening strategy as mutations in these genes are known to affect silencing without associated loss of DNA methylation (Vaillant *et al*, 2006; Liu *et al*, 2010; Bourguet *et al*, 2020; Yin *et al*, 2009; Elmayan *et al*, 2005). In the last mutant, *p14 12-1*, we identified a C to T substitution in *ATIG79950* (*REGULATOR OF TELOMERE LENGTH 1*, *RTEL1*), causing a premature stop codon at the amino acid position 712 (Figure 1a-c, S2a), most likely leading to an abortion of translation. Complementation test between *p14 12-1* and the independent *rtell-1* T-DNA insertion mutant line (Recker *et al*, 2014), rescue of *p14 12-1* defects with a *RTEL1* genomic copy, and introducing L5-GUS in the *rtell-1* background confirmed that mutation of *RTEL1* was responsible for the observed silencing defects (Figure 1, S2b-d). Hence, *p14 12-1* was renamed *rtell-3*. In addition to the L5-GUS transgene, silencing of the Athila retrotransposon-derivates *TSI* repeats was destabilized to some extent in *rtell* mutants, and expression of the silenced 45S rRNA variant VAR1 was activated in *rtell-3* (Figure 1d).

### **Loss of *rtell* upregulates DNA damage response genes and genes enriched in H3K27me3.**

To define how mutations in *RTEL1* affect transcription across the genome, we conducted RNA sequencing (RNA-seq) on *rtell-1* and *rtell-3* mutant seedlings and compared their transcriptomes to that of WT (L5) plants. We identified 346 and 781 differentially expressed genes (DEGs) in *rtell-1* and *rtell-3*, respectively. The large majority of DEGs in *rtell-1* (75%) and *rtell-3* (90%) were upregulated, indicating that loss of *RTEL1* primarily leads to the upregulation of transcripts (Figure 2a). Notably, the upregulated transcripts were mostly derived from protein coding genes (PCGs), although 16 and five TEs were also upregulated in *rtell-3* and *rtell-1*, respectively. We identified 687 PCGs upregulated in *rtell-3* and 261 in *rtell-1*, with about 76% of the *rtell-1* upregulated PCGs being also upregulated in *rtell-3* (Figure 2b). Thus, *rtell-3* has a stronger impact on transcription compared to *rtell-1*. These results indicate that *RTEL1* is required for proper expression of several hundreds of genes and silencing of a subset of heterochromatic repeats.

Previous studies in *Arabidopsis* have shown that *RTEL1* is required for proper DNA replication and DNA repair, and its loss causes activation of DNA repair genes (Dorn *et al*, 2019; Recker *et al*, 2014). Accordingly, Gene Ontology (GO) analysis indicated that genes involved in response to DNA damage and DNA damage repair were overrepresented among PCGs upregulated in both *rtell-1* and *rtell-3* (Figure 2c, Table S1). This suggests that *rtell* mutants undergo constitutive replicative stress, which likely contributes to the upregulation of

a subset of PCGs. Interestingly, *rtell*-upregulated PCGs were also enriched in stress responsive genes (Figure 2c, Table S1). Stress-responsive genes are enriched in the histone variant H2A.Z, and the majority of H2A.Z nucleosomes associate with the H3K27me3 repressive histone modification in *Arabidopsis* (Carter *et al*, 2018; Coleman-Derr & Zilberman, 2012). We determined genome-wide H3K27me3 patterns in wild-type and *rtell-3* seedlings using chromatin immunoprecipitation followed by sequencing (ChIP-seq). More than 65% of *rtell-3* upregulated PCGs were associated with high levels of H3K27me3 in the wild type (Figure 2d, e). Notably, *rtell*-upregulated PCGs associated with H3K27me3 were enriched in GO-terms related to stress response, whereas GO-terms involved in DNA damage response were only enriched in *rtell*-upregulated PCGs that were not marked by H3K27me3 (Table S2-5). Consistent with H3K27me3 repressing their transcription, *rtell-3*-upregulated PCGs enriched in H3K27me3 had significantly enhanced transcript accumulation in double mutants for the CURLY LEAF and SWINGER H3K27me3 methyltransferases, as compared to *rtell*-upregulated PCGs not marked by H3K27me3 (Figure 2f). Additionally, we found that loss of RTEL1 was associated with a moderate but reproducible reduction in H3K27me3 at upregulated PCGs associated with this mark in the WT (Figure 2d). Together, these findings suggest that both constitutive replicative stress and perturbed H3K27me3-mediated silencing likely contribute to PCG upregulation in *rtell* through at least partly independent pathways.

### **RTEL1 prevents heterochromatin DNA hypermethylation**

The *QUA-QUINE STARCH (QQS)* gene is among the few PCGs that are downregulated in *rtell* mutants. *QQS* is located in the pericentromeric heterochromatin of chromosome 3, and its expression is negatively correlated with the DNA methylation level of repeated sequences located within the 5' end of the gene (Silveira *et al*, 2013; Rigal *et al*, 2016). This led us to speculate that RTEL1 deficiency may alter DNA methylation patterns at some endogenous sequences. We investigated this possibility by determining genome-wide DNA methylation profiles in WT and *rtell-3* plants using bisulfite sequencing (BS-seq). This showed that DNA methylation levels of the 5' end of *QQS* were indeed increased in *rtell-3* in correlation with transcriptional downregulation of the gene (Figure S3a). More surprisingly, we found that CHG methylation levels were significantly increased at the L5-GUS transgene in *rtell-3*, despite transcriptional reactivation (Figure S3b).

As expected from the general anticorrelation between DNA methylation and H3K27me3 (Mathieu *et al*, 2005; Deleris *et al*, 2012; Weinhofer *et al*, 2010), *rtell-3* upregulated PCGs, which are enriched in H3K27me3, showed low DNA methylation levels in

the WT, and these remained unaffected in *rtell-3* (Figure S3c). We plotted average DNA methylation levels along chromosomes and found no overt change in CG DNA methylation in *rtell-3* mutants (Figure 3a). However, we observed that DNA methylation levels of pericentromeric regions were noticeably increased at CHG, and to a lesser extent, CHH sites (Figure 3a). Consistently, average CHG, and to a lesser extent, CHH methylation levels were increased over TEs in *rtell-3* compared to WT (Figure S3d). All three CHG sequence subcontexts (CAG, CTG and CCG) were equally hypermethylated in *rtell-3* (Figure S3d). Separating TEs according to their genomic localization showed that non-CG hypermethylation in *rtell-3* was much more pronounced at pericentromeric TEs than at TEs located on chromosome arms (Figure 3b). We also determined differentially methylated regions (DMRs) in *rtell-3* relative to WT plants and found that *rtell-3* mostly induced CHG hypermethylation, which was largely clustered at pericentromeric TE-rich heterochromatin (Figure 3c, d). Arabidopsis heterochromatin is associated with the H2A.W histone variant and enriched in H3K27me1 (Yelagandula *et al*, 2014; Jacob *et al*, 2009). We found that the gain in DNA methylation in *rtell-3* specifically occurred at regions associated with these heterochromatin features and was particularly marked at CHG sites, although heterochromatic CG and CHH sites did show some degree of hypermethylation (Figure 3e). However, this increase in DNA methylation levels was not associated with the upregulation of DNA methyltransferases genes (including *CMT3*) or the downregulation of DNA demethylase genes (Figure S3e). These results demonstrate that RTEL1 is required for maintaining proper patterns of heterochromatin DNA methylation, particularly at CHG sites.

### **Higher order chromatin organization appears unaltered in *rtell***

In 4',6-diamidino-2-phenylindole (DAPI) stained WT nuclei, heterochromatin appears as brightly stained foci called chromocenters, which contain most of the highly repetitive DNA in the genome, including ribosomal DNA (rDNA) and satellite repeats. The nuclei of WT and *rtell-3* plants contained a similar number of chromocenters and an equivalent relative heterochromatic fraction (Figure 4a, b). Previous studies have shown that *rtell-1* mutants display a reduced number of 45S rDNA repeats (Röhrig *et al*, 2016; Dorn *et al*, 2019), however, we were unable to detect variation in the amount of 45S rDNA repeats in *rtell-3* (Figure S4). To further investigate a potential impact of *rtell-3* on higher-order chromatin structure, we profiled chromatin accessibility in WT and *rtell-3* seedlings using Assay for Transposase-Accessible Chromatin followed by high-throughput sequencing (ATAC-seq). We found that *rtell-3* did not affect overall chromatin accessibility profiles (Figure 4c, d). A

closer examination of *rtell* upregulated PCGs revealed that increased chromatin accessibility was not required for, nor a necessary consequence of, the transcriptional upregulation of these genes. Rather, these showed a moderate decrease in accessibility around their transcription start site (TSS), possibly reflecting active loading of the transcription machinery at these genes in the mutant (Figure 4d). In conclusion, our results suggest that higher-order chromatin organization remains largely intact in *rtell-3*.

### **RTEL1 influences gene expression largely independently of POL2A and MAIL1**

Two mutant alleles of the *POL2A* gene encoding the catalytic subunit of polymerase epsilon were recovered from our screen (Figure S1). We previously reported that *pol2a* mutations releases heterochromatin silencing and leads to increased levels of DNA methylation, particularly at CHG sites (Bourguet *et al*, 2020)□. However, in contrast to *rtell-3*, TEs located outside pericentromeric heterochromatin along chromosome arms also exhibit marked CHG hypermethylation in *pol2a* mutants (Figure 3b, S5a)□ (Bourguet *et al*, 2020). Part of the CHG hypermethylation in *pol2a* is accounted by increased expression of *CMT3* (Bourguet *et al*, 2020)□; however, *CMT3* transcript accumulation was not up-regulated in *rtell-3* (Figure S3e). Additionally, heterochromatin gains CG methylation in *rtell-3*, but not in *pol2a-12* (Bourguet *et al*, 2020). We sought to analyze epistasis between *pol2a* and *rtell* mutations. However, we were unable to isolate *rtell pol2a* double mutants in the progeny of self-fertilized *rtell-3 pol2a-12* double heterozygotes or either sesquimutants, suggesting a lethal genetic interaction between *rtell-3* and *pol2a-12*. Comparing the transcriptomes of *pol2a-12* and *rtell-3* single mutants revealed little overlap of upregulated PCGs (Figure S5b). Although perturbed H3K27me3-mediated silencing likely contributes to transcriptional upregulation of PCGs in both *pol2a* and *rtell* (see Figure 2d-f) (Bourguet *et al*, 2020), the sets of H3K27me3-marked PCGs upregulated in each mutant were mostly distinct (Figure S5b), and *rtell*-upregulated PCGs displayed much higher average H3K27me3 levels than *pol2a*-upregulated genes (Figure S5c). Altogether, our data suggest that *RTEL1* and *POL2A* function in at least partly distinct pathways to regulate gene expression and restrain DNA methylation.

We previously showed that *MAIL1* regulates the expression of numerous genes and ensures silencing of a set of pericentromeric TEs in addition to the L5-GUS transgene independently of DNA methylation (Ikeda *et al*, 2017). Although *mail1* mutants display severe developmental defects that do not resemble *rtell-3* mutant phenotype, TEs show increased levels of non-CG methylation in both mutants (Figure S5d) (Nicolau *et al*, 2020; Bourguet *et al*, 2020). We sought to test the genetic interaction between *rtell* and *mail1*



mutations in non-CG DNA hypermethylation by crossing *rtell-3* with the *maill-1* knockout mutant. However, we were unable to obtain any *rtell-3 maill-1* double mutant plants in the progeny of double heterozygotes or in the progeny of *rtell-3 MAIL1/maill-1* sesquimutant, indicating that RTEL1 and MAIL1 are synergistically required for viability. Transcriptome comparison of *rtell-3* and *maill-1* single mutants highlighted distinct sets of upregulated PCGs with limited overlap regardless of their association with H3K27me3 (Figure S5e). We conclude that *RTEL1* and *MAIL1* regulate gene expression through largely non-overlapping molecular pathways.

### **RTEL1 stabilizes H3K27me3 level over heterochromatin.**

We also recovered a mutant allele of *MOM1* from our screen for mutants that release silencing without loss of DNA methylation (Figure S1). *MOM1* was the first identified protein required for transcriptional silencing independent of DNA methylation in *Arabidopsis* (Amedeo *et al*, 2000), and disruption of *MOM1* releases silencing of the L5-GUS transgene and of many pericentromeric sequences (Amedeo *et al*, 2000; Elmayan *et al*, 2005; Vaillant *et al*, 2006). We obtained *rtell-3 mom1-2* double mutants, which were phenotypically indistinguishable from *rtell-3* single mutants (Figure 5a). Histochemical staining for GUS activity revealed that L5-GUS silencing was more strongly released in *mom1* than in *rtell* and *rtell mom1* (Figure 5b), suggesting a genetic interaction between *rtell* and *mom1*. Similarly, release of silencing of the *TSI* repeats was significantly stronger in *mom1-2* than in *rtell-3*, and *rtell mom1* double mutants exhibited intermediate levels of *TSI* transcript accumulation (Figure 5c), indicating that *rtell* restrains *mom1*-induced reactivation at these loci. To further investigate epistasis between *rtell* and *mom1* mutations, we compared silencing defects in *mom1* and *mom1 rtell* using RNA-seq. We identified 72 reactivated TEs in *mom1*, the majority of which showed a sharp reduction in transcript levels in *mom1-2 rtell-3* (Figure 5d), suggesting that RTEL1 is required for silencing release in *mom1-2*. We previously reported that TE transcription in *mom1-2* requires MEDIATOR14 (MED14) (Bourguet *et al*, 2018). However, *MED14* transcript levels were similar in WT and *rtell* plants (Figure S6), suggesting that the requirement for RTEL1 and MED14 were independent. We hypothesized that RTEL1 dependency for *mom1*-induced silencing release might rely on changes in chromatin structure and/or patterns of epigenetic marks at these loci in the absence of RTEL1. Chromatin accessibility of TEs silenced by *MOM1* was not altered in *rtell* (Figure S7). However, these TEs showed marked hypermethylation of CHG sites and, more surprisingly, an increased association with H3K27me3 in the absence of RTEL1 (Figure 5e, f). Thus,

increased levels of these two repressive marks possibly contribute to limiting *mom1*-induced activation of these endogenous loci in the *rtell mom1* background.

Since MOM1-regulated TEs are mostly located in heterochromatin, we further analyzed changes in H3K27me3 over heterochromatic sequences in *rtell-3*. We found that, on average, TEs located in chromosome arms or in pericentromeres exhibited equally low association with H3K27me3 compared to PCGs in the WT (Figure 6a). Loss of RTEL1 was associated with increased levels of H3K27me3 over TEs located in pericentromeres, while TEs in chromosome arms and PCGs remained largely unaffected (Figure 6a), suggesting that heterochromatin specifically gain H3K27me3 in *rtell*. To strengthen this conclusion, we determined H3K27me3 changes in *rtell* in relation to H2A.W and H3K27me1. Genomic regions depleted in these heterochromatin marks showed no change in H3K27me3, whereas enrichment in H2A.W and H3K27me1 positively correlated with increased association with H3K27me3 in *rtell* (Figure 6b). Thus, our data indicate that in the absence of RTEL1, heterochromatin regions of the genome specifically gain H3K27me3.

#### **Accumulation of DNA cross-links destabilizes silencing.**

It has been shown previously that RTEL1 functions in the repair events of DNA crosslinks (Hu *et al*, 2015; Recker *et al*, 2014). We used mitomycin C (MMC) and *cis*-platin (CP) crosslinking agents to assess whether accumulation of DNA crosslinks impacts transcriptional silencing. MMC mainly generates inter-strand cross-links on DNA, whereas CP preferentially forms intra-strand cross-links. Histochemical staining showed that applying CP or MMC to WT (L5) plants reactivated L5-GUS expression (Figure 7a, b). In these plants, L5-GUS expression appeared more pronounced in (non-replicating embryonic tissues) cotyledons, with MMC treated plants additionally showing GUS reactivation in hypocotyl and adult root regions, a pattern similar to that observed in untreated *rtell* mutants (Figure 7a). Drug treatment did not enhance GUS reactivation in *rtell-3* (Figure 7a, b). RNA-seq revealed that about half of the PCGs upregulated upon MMC treatment in the WT were also upregulated in untreated *rtell-3* plants (Figure 7c). Conversely, PCGs differentially expressed in *rtell-3* in the absence of drug were on average similarly differently expressed when WT plants were exposed to MMC (Figure 7d). Globally, transcriptional changes associated with *rtell-3* mutation and those induced by treating WT plants with MMC showed positive correlation (Figure S8). These data show that inducing DNA crosslinks leads to release of silencing and suggest that accumulation of these DNA lesions may be, at least partly, at the origin of transcriptional defects in *rtell* mutants.

In Arabidopsis, the FANCB helicase, closely related to RTEL1, is also involved in the repair of inter-strand crosslinks. However, both helicases were shown to act in independent pathways of inter-strand crosslinks repair (Dorn *et al*, 2019). We combined *rte1-3* mutation with the *fancjb-1* mutation by crossing and obtained *rte1-3 fancjb-1* double mutants containing the L5-GUS transgene. The *fancjb-1* mutants were indistinguishable from their WT siblings; however, *rte1-3 fancjb-1* plants exhibited a more severe developmental phenotype compared to *rte1-3* and first generation double mutants were complete sterile (Figure 7e, Figure S9a). We found that L5-GUS expression remained silenced in *fancjb-1*, whereas L5-GUS silencing was further released in *rte1-3 fancjb-1* double mutants compared to *rte1-3* single mutants (Figure 7f). Similarly, silencing release of the Athila retrotransposon-derivates repeats (TSI) was enhanced in *rte1-3 fancjb-1* compared to *rte1-3* (Figure S9b). Thus, in the absence of RTEL1, FANCB appears to restrain silencing release. Taken together, these results indicate that RTEL1-mediated repair of inter-strand crosslinks has a prominent role in silencing, and that FANCB backs up RTEL1 to promote efficient silencing.

## Discussion

In this study, we uncover unappreciated roles for the DNA helicase RTEL1 in transcriptional silencing and in controlling DNA methylation and H3K27me3 patterns. RTEL1 deficiency releases transcriptional silencing and is associated with changes in H3K27me3 levels characterized by a reduction at up-regulated genes and an increase over heterochromatin. In addition, DNA methylation levels increase in heterochromatin, particularly at CHG sites.

In Arabidopsis, mouse, human cells, and *C. elegans*, RTEL1 plays an essential and conserved DNA function in facilitating replication, which ensures genome stability and cell cycle progression (Dorn *et al*, 2019; Hu *et al*, 2015; Recker *et al*, 2014; Röhrig *et al*, 2016; Vannier *et al*, 2013; Uringa *et al*, 2012; Barber *et al*, 2008). RTEL1 associates with PCNA via a PIP box domain in its C terminus that is conserved in human, mouse and Arabidopsis, and accumulates at sites of replication stress, suggesting that RTEL1 could target stalled replisomes and facilitate replication fork progression by resolving DNA secondary structures (Hu *et al*, 2015; Vannier *et al*, 2013). We previously reported that inhibiting replication fork progression by depleting the cellular dNTP pool through the supply of HU induces loss of silencing (Bourguet *et al*, 2020). RTEL1 deficiency is associated with prolonged S-phase duration, likely due to the accumulation of cross-linked DNA (Hu *et al*, 2015), and we show

here that treatment with the cross-linking agents, which also likely interferes with replication fork progression, also results in release of silencing. These findings support that replication stress can trigger transcription of normally silent regions. Interestingly, we found that exposing *rtell* plants to cross-linking agents did not further enhance the release of silencing, suggesting that *rtell* mutation and cross-linking agents may act through a common pathway to cause silencing loss. This supports the hypothesis that RTEL1-mediated repair of inter-strand crosslinks is essential for stabilizing transcriptional silencing. FANCB, one of the 5'-3' DNA helicases, has been reported to play a role in repairing inter-strand crosslinks in Arabidopsis independently of RTEL1 (Dorn *et al*, 2019). We find that the combined deficiency of both helicases results in developmental defects and complete sterility. This synthetic sterility appears to be evolutionarily conserved as *C. elegans* double mutants for *rtell* and the FANCB homolog *dog-1* fail to develop embryos due to germline proliferation defects, which were assigned to replicative stress (Barber *et al*, 2008). Our data suggest that in the absence of RTEL1, FANCB-mediated repair of inter-strand crosslinks serves a backup function restraining loss of silencing. FANCB was shown to function alongside RTEL1 to overcome covalent DNA-protein crosslinks that constitute bulky roadblocks to the advancing DNA replication machinery (Sparks *et al*, 2019; Yaneva *et al*, 2023); however, inter-strand DNA crosslinks constitute different barriers to replisome progression. Repair of covalent links between DNA strands is a complex multi-step process with several functional levels including inter-strand crosslink detection and unhooking by DNA incisions that generate a double strand break, monoadduct bypass and removing, and finally recombinational repair of double strand break, which eventually restore replication fork progression. *In vitro*, purified human RTEL1 mediates dismantling of displacement loops (D loops) that are formed as recombination intermediates (Barber *et al*, 2008), and this anti-recombinase activity of RTEL1, which allows replication fork progression, is conserved in Arabidopsis (Recker *et al*, 2014; Hu *et al*, 2015; Olivier *et al*, 2018). Thus, RTEL1 deficiency may result in the accumulation of incompletely processed and toxic joint DNA molecules during repair of inter-strand crosslink-induced DNA damage, which perturbs DNA replication. FANCB plays a crucial function in branch-migration, which suppresses these intermediate DNA structures (Awate *et al*, 2020). Additionally, FANCB can destabilize the RAD51 nucleoprotein filament associated with single-stranded DNA and inhibit the strand exchange reaction to complete homologous recombinational repair (Sommers *et al*, 2009). Therefore, we hypothesize that, to compensate the lack of RTEL1 and the presence of toxic recombination intermediates,

FANCB supports inter-strand crosslinks repair by inhibiting the strand exchange reaction, thereby alleviating replicative stress and silencing release.

How may replication stress destabilize silencing? Transcriptionally upregulated loci in *rtel1* are typically associated with either high levels of DNA methylation (e.g., L5-GUS transgene, TSI repeats) or enriched in H3K27me3 (PCGs). The propagation of these repressive epigenetic marks is tightly linked to DNA replication to ensure prompt restoration of the epigenetic landscape following doubling of the DNA amount (Jiang & Berger, 2017; Xu *et al*, 2010; Law & Jacobsen, 2010). As the replication fork progresses, newly synthesized DNA strands acquire their DNA methylation pattern by copying the preexisting DNA methylation information from the template strand. Parental histones are displaced and recycled with their modifications and re-deposited at their pre-replicative positions. New, unmodified histones are deposited, resulting in a twofold dilution of parental histone modification levels. These new histones are then modified to restore the parental level of histone modifications (Alabert *et al*, 2015; Reverón-Gómez *et al*, 2018). In yeast and animal cells, parental histone recycling is facilitated by the tethering of parental histones to the DNA polymerases alpha and epsilon, and disruption of this interaction leads to transcriptional defects (Bellelli *et al*, 2020; Evrin *et al*, 2018; Li *et al*, 2020). In HeLa cells, replication stress induced by HU treatment leads to local loss of histone (H3.1) recycling and severely impairs the spatial distribution of parental histones in the surrounding regions, which may likely contribute to epigenomic instability (Clément *et al*, 2018). We propose that, upon RTEL1 deficiency, defective repair of inter-strand crosslink-induced DNA damage creates local DNA perturbation at the replication fork that impair recycling of parental histones and delays epigenome restoration following DNA replication. This may provide a short time-window with locally reduced levels of H3K27me3 or DNA methylation, allowing transcription factor binding and transcription initiation in typically silent genomic regions. The gain in H3K27me3 over heterochromatin in *rtel1* might reflect relocation of this mark from chromosome arms towards this late replicating genome compartment, which appears less affected by replication stress-induced histone recycling defects in HeLa cells (Clément *et al*, 2018). RTEL1 deficiency is associated with increased levels of DNA methylation in heterochromatin, most prominently at CHG sites, which occurs independently of transcriptional upregulation of the DNA methyltransferases. We previously reported that replication stress induced by HU treatment and mutations in other DNA replication-related genes, such as POL2A, RPA2A, and POLD2, also lead to increased CHG methylation levels in heterochromatin (Bourguet *et al*, 2020). Hence, heterochromatin CHG hypermethylation

appears to be a molecular hallmark of replication stress. Recent studies in yeast have shown that fork stalling results in local chromatin alterations associated with higher levels of the H3K9me3 heterochromatin mark. This locally compacts chromatin and avoids fork collapse (Feng *et al*, 2019). In *Arabidopsis*, H3K9me2 serves as the functional equivalent of H3K9me3. Considering the tight interconnection between H3K9me2 and CHG methylation maintenance, a similar mechanism could contribute to the increased CHG methylation observed under replication stress. Methylation of CHG sites mostly occurs in heterochromatin, and because its maintenance is not as efficient as that of CG methylation (Niederhuth *et al*, 2016), it may explain why heterochromatin hypermethylation is skewed toward CHG sites in *rtell* and other mutants that exhibit constitutive replication stress. Heterochromatin is difficult to replicate, regularly causing replication fork stalling even in the WT (Zeman & Cimprich, 2014), which could contribute to maintaining higher CHG methylation levels in these genomic regions. Increased levels of CHG methylation (and H3K27me3) in heterochromatin likely mitigate transcriptional de-repression of the underlying sequences under replication stress. This is consistent with the impact of RTEL1 deficiency on *mom1*-induced transcription of heterochromatic TEs, and with the strong upregulation of TEs we previously observed in *pol2a cmt3* double mutants (Bourguet *et al*, 2020).

Our study reveals that POL2A and RTEL1 are synergistically required for *Arabidopsis* viability. This finding is consistent with a recent report indicating that removal of both RTEL1 and DNA polymerase epsilon leads to loss of viability in worms and vertebrates (Bellelli *et al*, 2020), indicating that this synthetic lethal interaction is conserved across different kingdoms. Notably, the combined loss of RTEL1 and DNA polymerase epsilon confers extensive genome instability and cessation of DNA replication in both worms and mouse cells (Bellelli *et al*, 2020). We also find that *rtell* is synthetic lethal when combined with *mail1*, which is known to cause DNA damage accumulation (de Luxán-Hernández *et al*, 2020). This suggests that RTEL1 function is essential to DNA replication in the presence of DNA damage. Together, our results highlight the importance of RTEL1 and its interaction with other DNA replication factors in maintaining epigenome integrity and cell viability.

## Materials and Methods

### Plant material

Plants were grown in soil in long-day conditions (16 h light, 8 h dark) at 23 °C with 60% relative humidity. The *rtell-3* mutant allele reported in this study was isolated from a

population of EMS mutagenized L5 plants that we previously described (Ikeda *et al.*, 2017)□. The *rtell-3* mutant was backcrossed twice to the parental L5 line before analysis. The *rtell-1* (SALK\_113285), *pol2a-12* (Bourguet *et al.*, 2020), *mail1-1* (GK-840E05), *mom1-2* (SAIL\_610\_G01) and *fancjb-1* (SALK\_101493) mutant lines used in this study were all in a L5 genetic background. Primers used in this study are listed in Table S6.

### **Histochemical staining**

Whole seedlings or rosette leaves were vacuum infiltrated twice 5 min with 3 ml of X- Gluc staining solution (50 mM NaHPO<sub>4</sub> pH 7; 10mM EDTA; 0.2% Triton-X-100; 0.04% X-Gluc) and incubated 24 h at 37°C in the dark. Chlorophyll was subsequently cleared with repeated washes in ethanol at room temperature.

### **Mutagenesis and mapping**

The mutant L5 population used in this study was obtained by mutagenesis as described in Ikeda *et al.*, 2017. To screen for mutants impaired in transcriptional gene silencing, one leaf per M2 plant was dissected and histochemically stained as previously described. DNA of plant selected at this stage was extracted from rosette leaves using Wizard Genomic DNA Purification kit (Promega) and digested with methylation-sensitive restriction enzyme (MspI or CfoI, NEB) according to the manufacturer's instructions. GUS 5' extremity and FWA gene (control region without MspI/CfoI restriction site) was amplified, and methylation levels were estimated by measuring the amplification ratio between the transgene and the control gene to select mutants that reactivate L5-GUS transgene independently of a loss of DNA methylation.

We performed mapping-by-sequencing using genomic DNA from a pool of 50-100 individual F2 mutant plants segregating from a *p14 12-1* x Ler cross. Libraries were prepared using the TruSeq Nano DNA Sample Preparation kit (Illumina) and sequenced on a NextSeq 500 instrument (Illumina) at FASTERIS S.A. (Geneva, Switzerland) to generate ~ 100M 150-bp paired-end reads. Reads were mapped on the *Arabidopsis* TAIR10 genome using BWA (Li & Durbin, 2009) with the default parameters. Single-nucleotide polymorphisms calling was performed using SAMtools mpileup followed by BCFtools view with the -bvgN option. Three candidate genes with EMS-induced non-synonymous mutations were identified in the mapping interval on chromosome 1. T-DNA mutant lines for the three candidate genes were analyzed for release of gene silencing and allelic tests were performed, allowing identification of *RTELI*.

### **Complementation of *rtell-3***

A genomic fragment containing the *RTELI* gene with its promoter region (1 kb upstream the ATG codon) was PCR amplified from Col-0 genomic DNA and cloned into the pDONR221 vector (Invitrogen) by BP recombination. Following sequence verification, this fragment was introduced in the GATEWAY destination vector pB7FWG2,0  $\Delta$ p35S by LR recombination. The resulting *pRTELI::RTELI* construct was introduced into *rtell-3* plants using *Agrobacterium*-mediated floral-dip transformation.

### **Drug Treatments**

The seeds were surface-sterilized with 0.05% SDS, 70% ethanol for 5 min, rinsed 5 min with 95% ethanol, air dried and evenly spread on sterile 0.8% agar, 1% sucrose and 1X Murashige and Skoog (M0255; Duchefa Biochemie) medium supplemented with or without the indicated concentrations of MMC (M0503; Sigma-Aldrich) or CP (TEVA Pharma). Whole seedlings were harvest at 14-day-old for analysis.

### **Transcript analysis**

Total RNA was extracted from immature inflorescences (stages 1-12) or aerial parts of 16-day-old seedlings using NucleoSpin RNA Plus kit (Macherey-Nagel) following the manufacturer's recommendations. Gel-based RT-PCR analyses were performed using the One-Step RT-PCR kit (Qiagen) in a final volume of 10  $\mu$ L starting from 0.03  $\mu$ g of DNase-treated (RQ1 Rnase-free Dnase supplemented with Rnasin Ribonuclease Inhibitor; Promega) total RNA. For RT-qPCR analyses, 1  $\mu$ g of Dnase-treated total RNA was reverse transcribed using the M-MLV Reverse Transcriptase (Promega) and Random Hexadeoxynucleotides (Promega) in a final volume of 25  $\mu$ L. Two microliters of cDNA was used for subsequent amplification using SensiFAST SYBR No-Rox Kit (Bioline) on an Eco™ Real-Time PCR System (Illumina), following a program of 5 min at 95°C, 40 cycles of 10 s at 95°C, and 30 s at 60°C, in a final reaction volume of 10  $\mu$ L. Amplification of *ACTIN2* gene transcripts was used as a reference for normalization and data were analyzed according to the  $2^{-\Delta\Delta Ct}$  method (Livak & Schmittgen, 2001).

### **mRNA sequencing**

Total RNA was extracted from 14- or 16-day-old seedlings with RNAzol (Euromedex) and then treated with the RQ1 RNase-free DNase (Promega) supplemented with Rnasin Ribonuclease Inhibitor (Promega), cleaned up either with phenol-chloroform and precipitated



with ethanol or with RNA Clean & Concentrator -5 kit (Zymo Research). Two biological replicates were collected for each genotype. Libraries were prepared using the TruSeq Stranded mRNA Library Prep kit (Illumina) and sequenced on a HiSeq 4000 instrument (Illumina) at FASTERIS S.A. (Geneva, Switzerland) to generate ~ 26–35M 50-bp single-end reads. Reads were aligned to the TAIR10 Arabidopsis genome plus the L5-GUS transgene with STAR version 2.7.9a (Dobin *et al*, 2013) retaining multi-mapped reads mapping up to 10 positions. Subsequent read counting on TEs and PCGs was performed with featureCounts version 2.0.3 (Liao *et al*, 2014) using the Araport11 genome annotation. Normalization and differential analyses were done using DESeq2 version 1.26.0 (Love *et al*, 2014) with default parameters. Only loci with absolute fold-change  $\geq 1$  and Benjamini-Hochberg adjusted *P* values  $< 0.05$  were considered differentially expressed. We also re-analyzed publicly available data for *mail1* (ERR1593753, ERR1593754, ERR1593761, ERR1593762 (Ikeda *et al*, 2017)), *pol2a-12* (ERR4194076 - ERR4194079 (Bourguet *et al*, 2020)) and *clf swn* (SRR1931614, SRR1931620, SRR2500947, SRR2962411 (Wang *et al*, 2016)).

### **Gene Ontology analysis**

GO enrichment analysis was performed using the PANTHER Overrepresentation Test (version 17.0; <http://pantherdb.org/> (Mi *et al*, 2019; Ashburner *et al*, 2000; The Gene Ontology Consortium *et al*, 2021)). Statistical significance was calculated by Fisher's exact test and adjusted using the Bonferroni correction for multiple testing (multiplication of the single-test *P* value by the number of independent tests to obtain an expected error rate) and *P* values  $< 0.05$  were deemed statistically significant. Fold enrichment corresponds to the ratio of upregulated PCGs numbers annotated in the ontology term over all genes annotated in this term and was considered overrepresented if it was greater than 1.

### **Bisulfite sequencing (BS-seq)**

Genomic DNA was extracted from 16-day-old seedlings with the Wizard Genomic DNA Purification Kit (Promega), following the manufacturer's instructions. Sodium bisulfite conversion, library preparation, and sequencing on a HiSeqXten were performed at the Beijing Genomics Institute (Hong Kong), producing ~ 26–35M 150-bp paired-end reads. Data analysis was done using the Methylypy analysis pipeline v1.4.6 (Schultz *et al*, 2015). Reads were filtered to remove PCR duplicates using Picard v2.23.3 and mapped to TAIR10 using Bowtie2 v2.4.1 (Langmead & Salzberg, 2012). Only cytosines with a minimum coverage of 6 reads were retained. To calculate average methylation levels at specific regions, we used the

add-methylation-level function from Methylpy (Schultz *et al*, 2015) . TEs located in euchromatic arms and TEs located in pericentromeric regions were previously defined (Bourguet *et al*, 2021). We also re-analyzed publicly available data for *mail1* (ERR1593765 - ERR1593768 (Ikeda *et al*, 2017)) and *pol2a-12* (ERR4194158, ERR4194163 (Bourguet *et al*, 2020)).

### **Nuclei isolation and microscopy**

Rosette leaves from 3-week-old plants were fixed for one hour in 4% formaldehyde in 1X PBS and subsequently chopped on a glass slide. Tissues were covered with a coverslip, manually squashed and frozen in liquid nitrogen before removing the coverslip. Slides were washed twice in 1X PBS and DNA was stained with DAPI in Vectashield mounting medium (Vector Laboratories). Nuclei were visualized using a Zeiss Axio Imager Z.1 epifluorescence microscope (Carl Zeiss AG) with a PL Apochromat 100X/1.40 oil objective and images were captured with a Zeiss AxioCam MRm camera using the Zeiss ZEN software. The relative heterochromatin fraction was computed for each nucleus by calculating the ratio of the sum of chromocenter volume (area x intensity) over that of the entire nucleus using the ImageJ software.

### **Chromatin immunoprecipitation followed by sequencing (ChIP-seq)**

ChIP-seq was performed starting from 2-week-old seedlings grown in soil. Briefly, 1 g. of aerial tissues were fixed in 1% formaldehyde-containing MC buffer (Yelagandula *et al*, 2017). Fixed tissues were nitrogen frozen and ground to fine powder by vortexing in the presence of seven ceramic beads without thawing the extracts. Nuclei were isolated as previously described (Villar & Köhler, 2010) and resuspended in 1ml of 20mM Tris pH8, 2mM EDTA, 0.1% SDS 0.1%, 1X complete protease inhibitor cocktail (Roche). Chromatin was then sonicated in a Covaris S220 with the following settings: treatment time 5 min, acoustic duty factor 20%, PIP 170W, Cycles per burst 200 and max temperature 8°C. Following centrifugation at 13000rpm 4°C for 10 min., about half of the chromatin extract was used for immunoprecipitation with 5µg of H3K27me3 antibody (C15410069 Diagenode). IP, washes, and reverse crosslink were carried out as described in (Yelagandula *et al*, 2017) . Reverse crosslinked DNA was purified using Zymo ChIP DNA clean and concentrator columns following the manufacturer's instructions. Library preparation from the eluted DNA and PE100 sequencing on a DNBseq sequencing platform was performed at the Beijing

Genomics institute (Hong Kong). Two biological replicates were performed for each genotype.

Reads were trimmed and filtered for quality and adapter contamination using Trim Galore ([https://www.bioinformatics.babraham.ac.uk/projects/trim\\_galore/](https://www.bioinformatics.babraham.ac.uk/projects/trim_galore/)), and aligned to the TAIR10 genome plus the L5-GUS transgene using bowtie2. Multi-mapping reads were discarded, and probable PCR duplicates were removed using the Picard Tools suite. Sample tracks and metaplots over genomic regions were obtained using deeptools bamCoverage (-normalizeUsing RPGC).

### ATAC-seq

One hundred mg of 14-day-old seedlings were ground and nuclei were isolated with 4°C Buffer (0,25M Sucrose, 10mM Tris-HCl, 10mM MgCL2, 1% Triton, 5mM  $\beta$ -mercaptoethanol) containing proteinase inhibitor cocktail (Roche) and filtered in 63  $\mu$ m. Nuclei were resuspended in 1X TD Buffer (Illumina FC-121-1030) and 2.5  $\mu$ l of Tn5 Transposase (Illumina FC-121-1030) were added. Tagmentation reaction was performed at 37°C for 30min, and DNA was purified using a Qiagen MinElute Kit. DNA libraries were amplified for a total of 8 cycles. The libraries were then subjected to 1  $\times$  75 bp high-throughput sequencing using a NextSeq 500 instrument (Illumina). Reads were mapped to the *Arabidopsis* TAIR10 reference genome using STAR version 2.7.2b (Dobin *et al*, 2013). Peaks were called with MACS2 v2.2 (Zhang *et al*, 2008). Data for generating metaplots was obtained with DeepTools v3.3.2 (Ramírez *et al*, 2016).

### Data availability

High throughput sequencing data generated in this study has been deposited in the Gene Expression Omnibus (GEO) database under accession number GSE197614. All other data supporting the findings of this study are available within the manuscript and its Supplementary Files or are available from the corresponding author upon request.

### Legends to figures

**Figure 1: Mutations in *RTELI* release transcriptional silencing of the L5-GUS transgene.** (a) Photos of 3-week-old plants of the indicated genotypes. Scale bar, 1cm. (b) L5-GUS transgene activity detected by histochemical staining in 3-week-old plants of the

indicated genotypes. (c) Representation of *RTEL1* gene with the insertion and mutation positions of the three mutant alleles. The point mutation identified in *rtell-3* and the resulting amino acid change are indicated in red. (d) RT-PCR analysis of transcripts from endogenous repeats, TSI (Transcriptionally Silent Information) and 45S rRNA genes. Amplification of *UBQ1* (*UBIQUITIN EXTENSION PROTEIN 1*) was used as a loading control. For each target, PCR in the absence of reverse transcription (no RT) was performed to control for genomic DNA contamination.

**Figure 2: Mutations in *RTEL1* upregulate transcription of DNA damage response and H3K27me3-enriched genes.** (a) Number of differentially expressed genes (DEGs) up- or down-regulated in *rtell-1* and *rtell-3*. (b) Venn diagram showing the overlap between *rtell-3* and *rtell-1* upregulated protein-coding genes (PCGs) (c) Gene Ontology terms enriched in *rtell* upregulated PCGs (common to both alleles) plotted in relation to fold enrichment. Circle size indicates the number of upregulated PCGs that are associated with each significant pathway. The circle color indicates the significant level with the adjusted *P* values < 0.05 (Fisher Exact test with Bonferroni correction,  $-\log_{10}$ ). Only child GO terms are represented. (d) H3K27me3 ChIP signal over *rtell-3* upregulated PCGs (left) and all H3K27me3-marked PCGs of the Arabidopsis genome (right). PCGs were scaled to 2 kb, and sequences 1 kb upstream their transcription start sites (TSS) or downstream their transcription end site (TES) were included. Average H3K27me3 signal over 50 bp bins is plotted. (e) Venn diagram showing the overlap between *rtell-3* upregulated PCGs and all H3K27me3-marked genes. (f) Changes in transcript accumulation at *rtell-3* upregulated PCGs associated or not with H3K27me3, and a random set of genes ( $n = 457$ ), in *clf-29 swn-21* double mutants (raw data from (Wang *et al*, 2016)). Asterisks mark statistically significant differences (unpaired, two-sided Mann-Whitney test,  $P$  value =  $1.76 \times 10^{-15}$ ).

**Figure 3: Loss of *RTEL1* causes heterochromatin DNA hypermethylation.** (a) Average DNA methylation level per 100kb windows on chromosome 4 in CG, CHG and CHH context. (b) Metaplots showing average DNA methylation levels in all three cytosine contexts at TEs located on chromosome arms (left) or in pericentromeric heterochromatin (right). TEs were aligned at their 5' and 3' ends (dashed lines). Average methylation over 100bp bins 3kb upstream and 3kb downstream from the alignment points is plotted. (c) Number of indicated differentially methylated regions (DMRs) in *rtell-3*. (d) Density of CHG hypermethylated DMRs over Arabidopsis chromosomes. Density of TEs is shown for comparison purpose. (e)

Smoothing spline fits (50 degrees of freedom) of changes in DNA methylation (*rtell-3* minus WT) at CG, CHG and CHH sites in 1kb windows plotted against H2A.W (left) or H3K27me1 (right) enrichment in the WT.

**Figure 4: Chromatin organization appears largely unaltered in *rtell-3*.** (a) Representative photos of DAPI-stained isolated nuclei in WT (L5 background) and *rtell-3*. Scale bar, 5 $\mu$ m. (b) Quantification of chromocenter number per nucleus (left) and heterochromatic fraction (chromocenters density / total nuclei density, right) of WT (L5 background) and *rtell-3* plants. ns, nonsignificant (unpaired Mann-Whitney test,  $P$  value > 0.2) (c) Heatmap (left) and metaplot (right) showing ATAC-seq signal over all accessibility peaks in WT and *rtell-3*. Peaks were aligned at their center position (0), and sequences 1kb upstream and 1kb downstream from the alignment point were included. Peaks in the heatmaps are stacked from highest (top) to lowest (bottom) ATAC-seq signal in the WT. (d) Metaplots showing ATAC-seq signal at *rtell-3* upregulated PCGs, all PCGs, and pericentromeric TEs in WT and *rtell-3*. Average signal over 100bp bins is plotted.

**Figure 5: Loss of RTEL1 suppresses *mom1*-induced release of silencing.** (a) Photos of 3-week-old plants of the indicated genotypes. Scale bar, 1cm. (b) Genome browser tracks showing mRNA profiles (RPKM) at the L5-GUS locus in the indicated genotypes (left). Two replicates are shown for mRNA-seq data. L5-GUS transgene activity detected by histochemical staining in isolated leaves of the indicated genotypes is shown on the right. (c) RT-qPCR analysis of TSI transcripts from rosette leaves of indicated genotypes. Transcript levels are normalized to *ACT2* and further normalized to L5. Sample means are shown with error bars representing standard error of the mean across three biological replicates. Asterisks mark statistically significant differences (unpaired, two-sided Student's t-test, \* $P$ <0.05, \*\* $P$ <0.005). (d) Heatmap of RNA-seq expression z-scores computed for *mom1-2* upregulated TEs across the indicated genotypes (left). A boxplot with the same data expressed in RPKM is shown on the right. (e) Metaplots showing average DNA methylation levels in all three cytosine contexts at *mom1-2* upregulated TEs in WT and *rtell-3*. TEs were scaled to 6 kb and sequences 3 kb upstream or downstream their 5' and 3' ends respectively were included. Average DNA methylation levels over 200 bp bins is plotted. (f) H3K27me3 ChIP-seq levels at *mom1-2* upregulated TEs in WT and *rtell-3*. Shaded areas represent standard deviation of two biological replicates. TEs were aligned as in (e).

**Figure 6: Heterochromatin H3K27me3 levels increase in *rtell*.** (a) H3K27me3 ChIP signal over TEs located in chromosome arms, TEs in pericentromeric heterochromatin, and all PCGs of the Arabidopsis genome. Sequences were scaled as in Figure 5e and average H3K27me3 signal over 200 bp bins is plotted. (b) Smoothing spline fits (50 degrees of freedom) of changes in H3K27me3 (*rtell-3* minus WT) in 1kb windows plotted against H2A.W or H3K27me1 enrichment in the WT.

**Figure 7: DNA cross-links accumulation destabilizes silencing.** (a) L5-GUS transgene activity detected by histochemical staining in 14-day old seedlings. WT and *rtell-3* plants were treated or not (Mock) with 2.5 mg/l of either *cis*-platin (CP) or mitomycin C (MMC) crosslinking agents. (b) L5-GUS transcript accumulation detected by quantitative RT-PCR in WT (L5) and *rtell-3* seedlings untreated (mock) or treated with CP and MMC as in (a). Values represent means from two biological replicates with *rtell-3* levels set to 1. Error bars represent standard error of the mean. Asterisks mark statistically significant differences (two-sided unpaired Mann-Whitney test, \*\*  $P$  value < 0.005); ns, nonsignificant (two-sided unpaired Mann-Whitney test,  $P$  value > 0.2). (c) Heatmap of normalized (z-score) expression level of PCGs upregulated in MMC-treated WT plants. (d) Box plot showing transcript accumulation (RPKM) from *rtell* upregulated PCGs and *rtell* downregulated PCGs in WT and *rtell-3* plants that have been treated (MMC) or not (-) with MMC. Error bars represent standard error of the mean across two biological replicates. (e) Representative images of 20-day old plants of the indicated genotypes. Scale bar is 1cm. (f) L5-GUS transcript accumulation detected by quantitative RT-PCR in the indicated genotypes. Values represent means from four biological replicates, with *rtell-3* set to 1. Error bars represent standard error of the mean across four biological replicates. Asterisks mark statistically significant differences (two-sided unpaired Mann-Whitney test, \*  $P$  value < 0.05).

## Supporting information

**Supplementary Figure 1: Mutant alleles of known silencing factors isolated in this screen.** (a) Representation of the genes with the mutation and the equivalent amino acid change in red. The numbers in brackets correspond to the position of the mutated nucleotide relative to the transcription start site. (b) Photos of the histochemical staining for GUS activity in leaves of the isolated mutants and WT plant (L5) as control.

**Supplementary Figure 2: A mutation in *RTELI* is responsible for silencing defects in *p14 12-1*.** (a) Mapping of *p14 12-1* mutation by mapping-by-sequencing Distribution of *Landsberg* (Ler) Single Nucleotide Polymorphism (SNP) frequency along the five Arabidopsis chromosomes in the F2 Ler x *p14 12-1* progeny. The dashed red box marks the region depleted in Ler SNP frequency that carries the causative mutation. (b) Photos of 3-week-old plants (top) and histochemical staining for GUS activity (bottom) of the *p14 12-1* mutant and complementation test between *rtell-1* and *p14 12-1*. (c) Representative images of histochemical staining for GUS activity in leaves from plants of the indicated genotypes. Three independent T1 lines were selected for *rtell-3::RTELI* complemented genotype. (d) RT-qPCR analysis of *rtell-3* upregulated transcripts from inflorescences of indicated genotypes. Transcript levels are normalized to *ACT2* and further normalized to *rtell-3* mutant. Sample means are shown with error bars representing standard error of the mean across three technical replicates.

**Supplementary Figure 3: DNA methylation profiles in *rtell-3* mutant.** (a) Genome browser tracks showing DNA methylation enrichment (in all three cytosine contexts) and mRNA profiles at QQS locus in WT and *rtell-3*. Local hypermethylation is represented in subtracting WT control WGBS-seq to *rtell-3*. Two replicates are shown for mRNA-seq data. (b) CG, CHG and CHH DNA methylation levels over L5-GUS transgene measured by WGBS-seq in WT and *rtell-3* plants. Error bars represent standard error of the mean across two biological replicates. (c) Metaplots showing average methylation rates in CG, CHG and CHH contexts found in *rtell-3* upregulated PCGs (left) or in all PCGs of the Arabidopsis genome (right). PCGs were scaled to 2 kb and sequences 1 kb upstream their transcription start site (TSS) or downstream their transcription end site (TES) were included. Average methylation levels per 100 bp windows were plotted. (d) CG, CHG, CHH (left) and CHG subcontexts (CAG, CCG and CTG, right) DNA methylation levels over all TEs in WT and *rtell-3*. TEs were aligned as in Figure 3b. (e) Transcript accumulation in reads per kilobase per million mapped reads (RPKM) at the indicated genes for WT and *rtell-3*. Error bars represent standard error of the mean across two biological replicates.

**Supplementary Figure 4: Analysis of rDNA copy number in *rtell* mutants.** The 45S rDNA copy number was determined by quantitative PCR in *rtell-1* and *rtell-3* mutants, in

relation to WT (L5 background) plants (n=3). Sample means are shown with error bars representing standard error of the mean across two biological replicates.

**Supplementary Figure 5: RTEL1 function is mostly independent of POL2A and MAIL1.**

(a) Metaplots showing average DNA methylation levels in all three cytosine contexts at TEs located on chromosome arms (left) or in pericentromeric heterochromatin (right) in *pol2a-12* mutant. TEs were aligned as in Figure 3b. (b) Venn diagram showing the overlap between *rtell-3*, *pol2a-12* upregulated PCGs and all H3K27me3-marked genes. (c) H3K27me3 ChIP signal over *rtell-3*, *pol2a-12* upregulated PCGs and all PCGs of the Arabidopsis genome. PCGs were scaled and plotted as in Figure 2d. (d) Metaplots showing TE methylation in *mail1-1* mutant represented as in a. (e) Venn diagram showing the overlap between *rtell-3*, *mail1-1* upregulated PCGs and all H3K27me3-marked genes. Methylome and transcriptome of *pol2a-12* and *mail1-1* mutants were re-analyzed from published data (Bourguet *et al*, 2020; Ikeda *et al*, 2017).

**Supplementary Figure 6: MED14 transcript levels in *rtell* mutants.** Genome browser tracks showing mRNA profiles at MED14 (AT3G04740) locus in WT, *rtell-1* and *rtell-3*. Two replicates are shown.

**Supplementary Figure 7: Chromatin accessibility at *mom1-2* upregulated TEs.** ATAC-seq depth over *mom1-2* up-regulated TEs in WT, *rtell-1* and *rtell-3* single mutants. TEs were scaled to 6 kb and sequences 3 kb upstream or downstream their 5' and 3' ends respectively were included. Average RPGC signal over 200 bp bins is plotted.

**Supplementary Figure 8: Gene expression changes in MMC-treated WT plants and untreated *rtell-3* plants.** Scatter plot showing correlation of transcriptional changes of all PCGs in *rtell-3* [ $\log_2(\text{rtell-3-NT/L5-NT})$ ] and in MMC-treated WT plants [ $\log_2(\text{WT-MMC/WT-NT})$ ]. The colored bin represents the count of PCGs from low (purple) to high (yellow). Linear regression line (red) and  $R^2$  ( $p < 2.2 \times 10^{-16}$ ) are indicated.

**Supplementary Figure 9: Sterility and silencing release observed in *rtell-3 fancjb-1* double mutants.** (a) Inflorescence (top) and individual silique (bottom) pictures of the indicated genotype plants. WT (L5 background) plants and single mutants show normal siliques while transformed flowers in *rtell-3 fancjb-1* double mutants did not self-fertilize and



silique elongation did not occur indicating no developing seeds. **(b)** RT-PCR analysis of transcripts from endogenous repeats, TSI (Transcriptionally Silent Information) and 106B. Each line represents biological replicates. Amplification of *UBQ1* (*UBIQUITIN EXTENSION PROTEIN 1*) was used as a loading control. For each target, PCR in the absence of reverse transcription (no RT) was performed to ensure any DNA contamination.

## Acknowledgments

We thank Hervé Vaucheret for the kind gift of the L5 line. Work in the Benhamed laboratory was supported by the Institut Universitaire de France (IUF). Y.H. was supported by China Scholar Council fellowships (201806690005). This work was supported by CNRS, Inserm, Université Clermont Auvergne, a Young Researcher grant from the Auvergne Regional Council (to O.M.), and a grant from the European Union under the Fonds Européen de Développement Régional (FEDER, project CELCIUS, to O.M.). A.H. was supported by a PhD studentship from the Ministère de l'éducation nationale, de l'enseignement supérieur et de la recherche. The funders had no role in study design, data collection and analysis, decision to publish, or preparation of the manuscript.

## References

- Alabert C, Barth TK, Reverón-Gómez N, Sidoli S, Schmidt A, Jensen ON, Imhof A & Groth A (2015) Two distinct modes for propagation of histone PTMs across the cell cycle. *Genes Dev* 29: 585–590
- Amedeo P, Habu Y, Afsar K, Scheid OM & Paszkowski J (2000) Disruption of the plant gene MOM releases transcriptional silencing of methylated genes. *Nature* 405: 203–206
- Ashburner M, Ball CA, Blake JA, Botstein D, Butler H, Cherry JM, Davis AP, Dolinski K, Dwight SS, Eppig JT, *et al* (2000) Gene Ontology: tool for the unification of biology. *Nat Genet* 25: 25–29
- Awate S, Sommers JA, Datta A, Nayak S, Bellani MA, Yang O, Dunn CA, Nicolae CM, Moldovan G-L, Seidman MM, *et al* (2020) FANCI compensates for RAP80 deficiency and suppresses genomic instability induced by interstrand cross-links. *Nucleic Acids Res* 48: 9161–9180
- Barber LJ, Youds JL, Ward JD, McIlwraith MJ, O'Neil NJ, Petalcorin MIR, Martin JS, Collis SJ, Cantor SB, Auclair M, *et al* (2008) RTEL1 Maintains Genomic Stability by Suppressing Homologous Recombination. *Cell* 135: 261–271
- Bellelli R, Youds J, Borel V, Svendsen J, Pavicic-Kaltenbrunner V & Boulton SJ (2020) Synthetic Lethality between DNA Polymerase Epsilon and RTEL1 in Metazoan DNA Replication. *Cell Rep* 31: 107675
- Bieluszewski T, Xiao J, Yang Y & Wagner D (2021) PRC2 activity, recruitment, and

silencing: a comparative perspective. *Trends Plant Sci* 26: 1186–1198

Bourguet P, de Bossoreille S, López-González L, Pouch-Pélissier M-N, Gómez-Zambrano Á, Devert A, Pélissier T, Pogorelcnik R, Vaillant I & Mathieu O (2018) A role for MED14 and UVH6 in heterochromatin transcription upon destabilization of silencing. *Life Sci Alliance* 1: e201800197

Bourguet P, López-González L, Gómez-Zambrano Á, Pélissier T, Hesketh A, Potok ME, Pouch-Pélissier M-N, Perez M, Da Ines O, Latrasse D, *et al* (2020) DNA polymerase epsilon is required for heterochromatin maintenance in Arabidopsis. *Genome Biol* 21: 283

Bourguet P, Picard CL, Yelagandula R, Pélissier T, Lorković ZJ, Feng S, Pouch-Pélissier M-N, Schmücker A, Jacobsen SE, Berger F, *et al* (2021) The histone variant H2A.W and linker histone H1 co-regulate heterochromatin accessibility and DNA methylation. *Nat Commun* 12: 2683

Carter B, Bishop B, Ho KK, Huang R, Jia W, Zhang H, Pascuzzi PE, Deal RB & Ogas J (2018) The Chromatin Remodelers PKL and PIE1 Act in an Epigenetic Pathway That Determines H3K27me3 Homeostasis in Arabidopsis. *Plant Cell* 30: 1337–1352

Clément C, Orsi GA, Gatto A, Boyarchuk E, Forest A, Hajj B, Miné-Hattab J, Garnier M, Gurard-Levin ZA, Quivy J-P, *et al* (2018) High-resolution visualization of H3 variants during replication reveals their controlled recycling. *Nat Commun* 9: 3181

Coleman-Derr D & Zilberman D (2012) Deposition of Histone Variant H2A.Z within Gene Bodies Regulates Responsive Genes. *PLoS Genet* 8: e1002988

Deleris A, Stroud H, Bernatavichute Y, Johnson E, Klein G, Schubert D & Jacobsen SE (2012) Loss of the DNA Methyltransferase MET1 Induces H3K9 Hypermethylation at PcG Target Genes and Redistribution of H3K27 Trimethylation to Transposons in Arabidopsis thaliana. *PLoS Genet* 8: e1003062

Dobin A, Davis CA, Schlesinger F, Drenkow J, Zaleski C, Jha S, Batut P, Chaisson M & Gingeras TR (2013) STAR: ultrafast universal RNA-seq aligner. *Bioinformatics* 29: 15–21

Dorn A, Feller L, Castri D, Röhrig S, Enderle J, Herrmann NJ, Block-Schmidt A, Trapp O, Köhler L & Puchta H (2019) An Arabidopsis FANCI helicase homologue is required for DNA crosslink repair and rDNA repeat stability. *PLoS Genet* 15: e1008174

Du J, Johnson LM, Jacobsen SE & Patel DJ (2015) DNA methylation pathways and their crosstalk with histone methylation. *Nat Rev Mol Cell Biol* 16: 519–532

Elmayan T, Proux F & Vaucheret H (2005) Arabidopsis RPA2: A Genetic Link among Transcriptional Gene Silencing, DNA Repair, and DNA Replication. *Curr Biol* 15: 1919–1925

Evrin C, Maman JD, Diamante A, Pellegrini L & Labib K (2018) Histone H2A-H2B binding by Pol  $\alpha$  in the eukaryotic replisome contributes to the maintenance of repressive chromatin. *EMBO J* 37: e99021

Feng G, Yuan Y, Li Z, Wang L, Zhang B, Luo J, Ji J & Kong D (2019) Replication fork stalling elicits chromatin compaction for the stability of stalling replication forks. *Proc Natl Acad Sci* 116: 14563–14572

Hu Z, Cools T, Kalhorzadeh P, Heyman J & De Veylder L (2015) Deficiency of the Arabidopsis Helicase RTEL1 Triggers a SOG1-Dependent Replication Checkpoint in Response to DNA Cross-Links. *Plant Cell* 27: 149–161

Iglesias FM, Bruera NA, Dergan-Dylon S, Marino-Buslje C, Lorenzi H, Mateos JL, Turck F,

Coupland G & Cerdán PD (2015) The Arabidopsis DNA Polymerase  $\delta$  Has a Role in the Deposition of Transcriptionally Active Epigenetic Marks, Development and Flowering. *PLoS Genet* 11: e1004975

Ikeda Y, Péliissier T, Bourguet P, Becker C, Pouch-Péliissier M-N, Pogorelcnik R, Weingartner M, Weigel D, Deragon J-M & Mathieu O (2017) Arabidopsis proteins with a transposon-related domain act in gene silencing. *Nat Commun* 8: 15122

Jacob Y, Feng S, LeBlanc CA, Bernatavichute YV, Stroud H, Cokus S, Johnson LM, Pellegrini M, Jacobsen SE & Michaels SD (2009) ATXR5 and ATXR6 are novel H3K27 monomethyltransferases required for chromatin structure and gene silencing. *Nat Struct Mol Biol* 16: 763–768

Jiang D & Berger F (2017) DNA replication–coupled histone modification maintains Polycomb gene silencing in plants. *Science* 357: 1146–1149

Langmead B & Salzberg SL (2012) Fast gapped-read alignment with Bowtie 2. *Nat Methods* 9: 357–359

Law JA & Jacobsen SE (2010) Establishing, maintaining and modifying DNA methylation patterns in plants and animals. *Nat Rev Genet* 11: 204–220

Li H & Durbin R (2009) Fast and accurate short read alignment with Burrows–Wheeler transform. *Bioinformatics* 25: 1754–1760

Li Z, Hua X, Serra-Cardona A, Xu X, Gan S, Zhou H, Yang W-S, Chen C, Xu R-M & Zhang Z (2020) DNA polymerase  $\alpha$  interacts with H3-H4 and facilitates the transfer of parental histones to lagging strands. *Sci Adv* 6: eabb5820

Li Z, Wang M, Zhong Z, Gallego-Bartolomé J, Feng S, Jami-Alahmadi Y, Wang X, Wohlschlegel J, Bischof S, Long JA, *et al* (2023) The MOM1 complex recruits the RdDM machinery via MORC6 to establish de novo DNA methylation. 2023.01.10.523455 doi:10.1101/2023.01.10.523455 [PREPRINT]

Liao Y, Smyth GK & Shi W (2014) featureCounts: an efficient general purpose program for assigning sequence reads to genomic features. *Bioinformatics* 30: 923–930

Lister R, O'Malley RC, Tonti-Filippini J, Gregory BD, Berry CC, Millar AH & Ecker JR (2008) Highly Integrated Single-Base Resolution Maps of the Epigenome in Arabidopsis. *Cell* 133: 523–536

Liu J, Ren X, Yin H, Wang Y, Xia R, Wang Y & Gong Z (2010) Mutation in the catalytic subunit of DNA polymerase  $\alpha$  influences transcriptional gene silencing and homologous recombination in Arabidopsis. *Plant J* 61: 36–45

Livak KJ & Schmittgen TD (2001) Analysis of Relative Gene Expression Data Using Real-Time Quantitative PCR and the  $2^{-\Delta\Delta CT}$  Method. *Methods* 25: 402–408

Love MI, Huber W & Anders S (2014) Moderated estimation of fold change and dispersion for RNA-seq data with DESeq2. *Genome Biol* 15: 550

de Luxán-Hernández C, Lohmann J, Hellmeyer W, Seanpong S, Wöltje K, Magyar Z, Pettkó-Szandtner A, Péliissier T, De Jaeger G, Hoth S, *et al* (2020) PP7L is essential for MAIL1-mediated transposable element silencing and primary root growth. *Plant J* 102: 703–717

Mathieu O, Probst AV & Paszkowski J (2005) Distinct regulation of histone H3 methylation at lysines 27 and 9 by CpG methylation in Arabidopsis. *EMBO J* 24: 2783–2791

Mathieu O, Reinders J, Čaikovski M, Smathajitt C & Paszkowski J (2007) Transgenerational

Stability of the Arabidopsis Epigenome Is Coordinated by CG Methylation. *Cell* 130: 851–862

Mi H, Muruganujan A, Ebert D, Huang X & Thomas PD (2019) PANTHER version 14: more genomes, a new PANTHER GO-slim and improvements in enrichment analysis tools. *Nucleic Acids Res* 47: D419–D426

Moissiard G, Bischof S, Husmann D, Pastor WA, Hale CJ, Yen L, Stroud H, Papikian A, Vashisht AA, Wohlschlegel JA, *et al* (2014) Transcriptional gene silencing by Arabidopsis microRNA homologues involves the formation of heteromers. *Proc Natl Acad Sci* 111: 7474–7479

Moissiard G, Cokus SJ, Cary J, Feng S, Billi AC, Stroud H, Husmann D, Zhan Y, Lajoie BR, McCord RP, *et al* (2012) MORC Family ATPases Required for Heterochromatin Condensation and Gene Silencing. *Science* 336: 1448–1451

Morel J-B, Mourrain P, Béclin C & Vaucheret H (2000) DNA methylation and chromatin structure affect transcriptional and post-transcriptional transgene silencing in Arabidopsis. *Curr Biol* 10: 1591–1594

Nicolau M, Picault N, Descombin J, Jami-Alahmadi Y, Feng S, Bucher E, Jacobsen SE, Deragon J-M, Wohlschlegel J & Moissiard G (2020) The plant mobile domain proteins MAIN and MAIL1 interact with the phosphatase PP7L to regulate gene expression and silence transposable elements in Arabidopsis thaliana. *PLoS Genet* 16: e1008324

Niederhuth CE, Bewick AJ, Ji L, Alabady MS, Kim KD, Li Q, Rohr NA, Rambani A, Burke JM, Udall JA, *et al* (2016) Widespread natural variation of DNA methylation within angiosperms. *Genome Biol* 17: 194

Olivier M, Charbonnel C, Amiard S, White CI & Gallego ME (2018) RAD51 and R $\square$ 1 compensate telomere loss in the absence of telomerase. *Nucleic Acids Res* 46: 2432

Probst AV, Dunleavy E & Almouzni G (2009) Epigenetic inheritance during the cell cycle. *Nat Rev Mol Cell Biol* 10: 192–206

Ramírez F, Ryan DP, Grüning B, Bhardwaj V, Kilpert F, Richter AS, Heyne S, Dünder F & Manke T (2016) deepTools2: a next generation web server for deep-sequencing data analysis. *Nucleic Acids Res* 44: W160–W165

Recker J, Knoll A & Puchta H (2014) The Arabidopsis thaliana Homolog of the Helicase RTEL1 Plays Multiple Roles in Preserving Genome Stability. *Plant Cell* 26: 4889–4902

Reverón-Gómez N, González-Aguilera C, Stewart-Morgan KR, Petryk N, Flury V, Graziano S, Johansen JV, Jakobsen JS, Alabert C & Groth A (2018) Accurate Recycling of Parental Histones Reproduces the Histone Modification Landscape during DNA Replication. *Mol Cell* 72: 239-249.e5

Rigal M, Becker C, Pélissier T, Pogorelnik R, Devos J, Ikeda Y, Weigel D & Mathieu O (2016) Epigenome confrontation triggers immediate reprogramming of DNA methylation and transposon silencing in Arabidopsis thaliana F1 epihybrids. *Proc Natl Acad Sci U S A* 113: E2083–E2092

Röhrig S, Schröpfer S, Knoll A & Puchta H (2016) The RTR Complex Partner RMI2 and the DNA Helicase RTEL1 Are Both Independently Involved in Preserving the Stability of 45S rDNA Repeats in Arabidopsis thaliana. *PLoS Genet* 12: e1006394

Sarkies P & Sale JE (2012) Propagation of histone marks and epigenetic memory during normal and interrupted DNA replication. *Cell Mol Life Sci* 69: 697–716

- Schönrock N, Exner V, Probst A, Gruissem W & Hennig L (2006) Functional Genomic Analysis of CAF-1 Mutants in *Arabidopsis thaliana*. *J Biol Chem* 281: 9560–9568
- Schultz MD, He Y, Whitaker JW, Hariharan M, Mukamel EA, Leung D, Rajagopal N, Nery JR, Urich MA, Chen H, *et al* (2015) Human Body Epigenome Maps Reveal Noncanonical DNA Methylation Variation. *Nature* 523: 212–216
- Silveira AB, Trontin C, Cortijo S, Barau J, Del Bem LEV, Loudet O, Colot V & Vincentz M (2013) Extensive Natural Epigenetic Variation at a De Novo Originated Gene. *PLoS Genet* 9: e1003437
- Sommers JA, Rawtani N, Gupta R, Bugreev DV, Mazin AV, Cantor SB & Brosh RM (2009) FANCDJ Uses Its Motor ATPase to Destabilize Protein-DNA Complexes, Unwind Triplexes, and Inhibit RAD51 Strand Exchange. *J Biol Chem* 284: 7505–7517
- Sparks JL, Chistol G, Gao AO, Räschle M, Larsen NB, Mann M, Duxin JP & Walter JC (2019) The CMG Helicase Bypasses DNA-Protein Cross-Links to Facilitate Their Repair. *Cell* 176: 167–181.e21
- Steimer A, Amedeo P, Afsar K, Franz P, Scheid OM & Paszkowski J (2000) Endogenous Targets of Transcriptional Gene Silencing in *Arabidopsis*. *Plant Cell* 12: 1165–1178
- Takeda S, Tadele Z, Hofmann I, Probst AV, Angelis KJ, Kaya H, Araki T, Mengiste T, Scheid OM, Shibahara K, *et al* (2004) BRU1, a novel link between responses to DNA damage and epigenetic gene silencing in *Arabidopsis*. *Genes Dev* 18: 782–793
- The Gene Ontology Consortium, Carbon S, Douglass E, Good BM, Unni DR, Harris NL, Mungall CJ, Basu S, Chisholm RL, Dodson RJ, *et al* (2021) The Gene Ontology resource: enriching a Gold mine. *Nucleic Acids Res* 49: D325–D334
- Tran RK, Henikoff JG, Zilberman D, Ditt RF, Jacobsen SE & Henikoff S (2005) DNA Methylation Profiling Identifies CG Methylation Clusters in *Arabidopsis* Genes. *Curr Biol* 15: 154–159
- Uringa E-J, Lisaingo K, Pickett HA, Brind'Amour J, Rohde J-H, Zelensky A, Essers J & Lansdorp PM (2012) RTEL1 contributes to DNA replication and repair and telomere maintenance. *Mol Biol Cell* 23: 2782–2792
- Vaillant I, Schubert I, Tourmente S & Mathieu O (2006) MOM1 mediates DNA-methylation-independent silencing of repetitive sequences in *Arabidopsis*. *EMBO Rep* 7: 1273–1278
- Vannier J-B, Sandhu S, Petalcorin MIR, Wu X, Nabi Z, Ding H & Boulton SJ (2013) RTEL1 Is a Replisome-Associated Helicase That Promotes Telomere and Genome-Wide Replication. *Science* 342: 239–242
- Villar CBR & Köhler C (2010) Plant Chromatin Immunoprecipitation. In *Plant Developmental Biology: Methods and Protocols*, Hennig L & Köhler C (eds) pp 401–411. Totowa, NJ: Humana Press
- Vongs A, Kakutani T, Martienssen RA & Richards EJ (1993) *Arabidopsis thaliana* DNA Methylation Mutants. *Science* 260: 1926–1928
- Wang H, Liu C, Cheng J, Liu J, Zhang L, He C, Shen W-H, Jin H, Xu L & Zhang Y (2016) *Arabidopsis* Flower and Embryo Developmental Genes are Repressed in Seedlings by Different Combinations of Polycomb Group Proteins in Association with Distinct Sets of Cis-regulatory Elements. *PLoS Genet* 12: e1005771
- Weinhofer I, Hehenberger E, Roszak P, Hennig L & Köhler C (2010) H3K27me3 Profiling of the Endosperm Implies Exclusion of Polycomb Group Protein Targeting by DNA

Methylation. *PLoS Genet* 6: e1001152

Xiao J & Wagner D (2015) Polycomb repression in the regulation of growth and development in Arabidopsis. *Curr Opin Plant Biol* 23: 15–24

Xu M, Long C, Chen X, Huang C, Chen S & Zhu B (2010) Partitioning of Histone H3-H4 Tetramers During DNA Replication–Dependent Chromatin Assembly. *Science* 328: 94–98

Yaneva D, Sparks JL, Donsbach M, Zhao S, Weickert P, Bezalel-Buch R, Stingle J & Walter JC (2023) The FANCI helicase unfolds DNA-protein crosslinks to promote their repair. *Mol Cell* 83: 43-56.e10

Yelagandula R, Osakabe A, Axelsson E, Berger F & Kawashima T (2017) Genome-Wide Profiling of Histone Modifications and Histone Variants in Arabidopsis thaliana and Marchantia polymorpha. In *Plant Genomics: Methods and Protocols*, Busch W (ed) pp 93–106. New York, NY: Springer

Yelagandula R, Stroud H, Holec S, Zhou K, Feng S, Zhong X, Muthurajan UM, Nie X, Kawashima T, Groth M, *et al* (2014) The Histone Variant H2A.W Defines Heterochromatin and Promotes Chromatin Condensation in Arabidopsis. *Cell* 158: 98–109

Yin H, Zhang X, Liu J, Wang Y, He J, Yang T, Hong X, Yang Q & Gong Z (2009) Epigenetic Regulation, Somatic Homologous Recombination, and Abscisic Acid Signaling Are Influenced by DNA Polymerase  $\epsilon$  Mutation in Arabidopsis. *Plant Cell* 21: 386–402

Yokthongwattana C, Bucher E, Čaikovski M, Vaillant I, Nicolet J, Scheid OM & Paszkowski J (2010) MOM1 and Pol-IV/V interactions regulate the intensity and specificity of transcriptional gene silencing. *EMBO J* 29: 340–351

Zemach A, Kim MY, Hsieh P-H, Coleman-Derr D, Eshed-Williams L, Thao K, Harmer SL & Zilberman D (2013) The nucleosome remodeler DDM1 allows DNA methyltransferases to access H1-containing heterochromatin. *Cell* 153: 193–205

Zeman MK & Cimprich KA (2014) Causes and Consequences of Replication Stress. *Nat Cell Biol* 16: 2–9

Zhang J, Xie S, Zhu J-K & Gong Z (2016) Requirement for flap endonuclease 1 (FEN1) to maintain genomic stability and transcriptional gene silencing in Arabidopsis. *Plant J Cell Mol Biol* 87: 629–640

Zhang X, Yazaki J, Sundaresan A, Cokus S, Chan SW-L, Chen H, Henderson IR, Shinn P, Pellegrini M, Jacobsen SE, *et al* (2006) Genome-wide High-Resolution Mapping and Functional Analysis of DNA Methylation in Arabidopsis. *Cell* 126: 1189–1201

Zhang Y, Liu T, Meyer CA, Eeckhoutte J, Johnson DS, Bernstein BE, Nusbaum C, Myers RM, Brown M, Li W, *et al* (2008) Model-based Analysis of ChIP-Seq (MACS). *Genome Biol* 9: R137

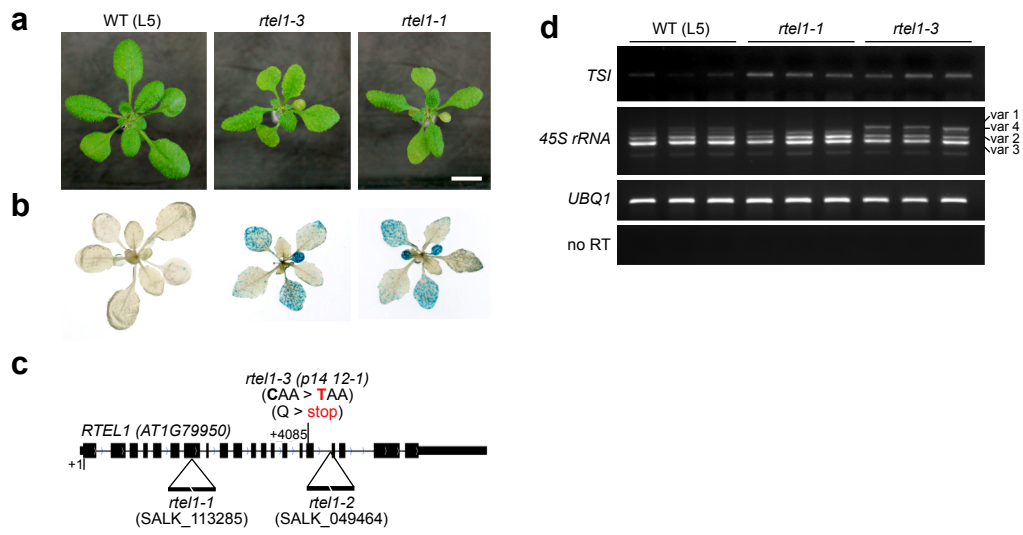

**Figure 1**

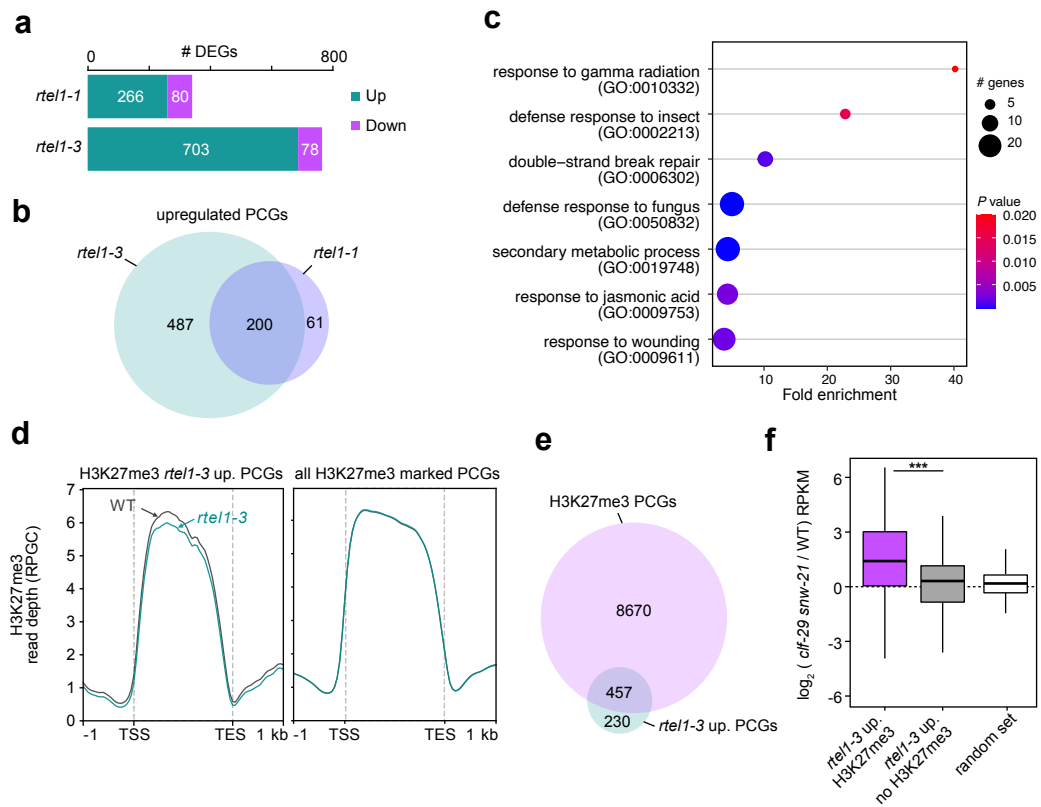

**Figure 2**



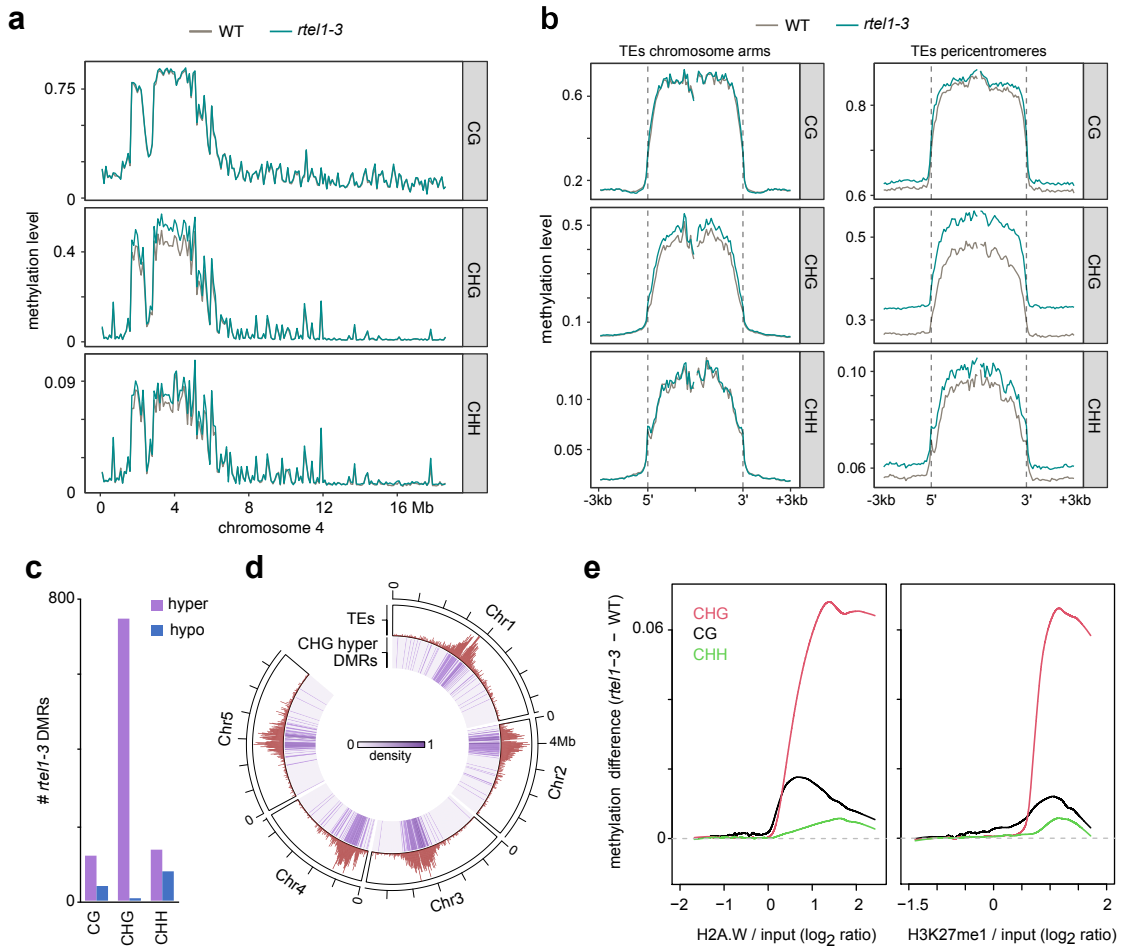

**Figure 3**

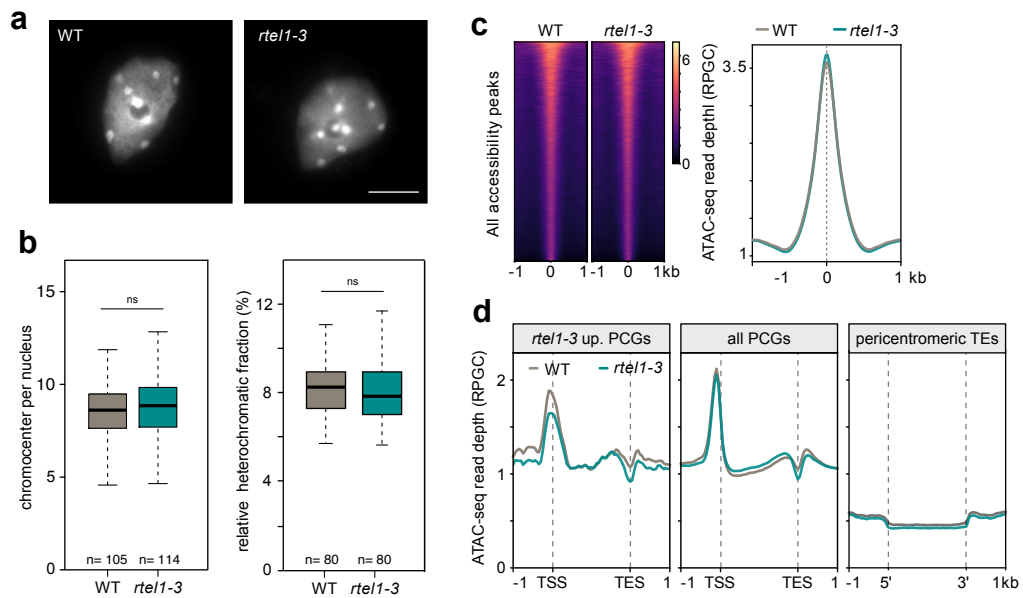

Figure 4

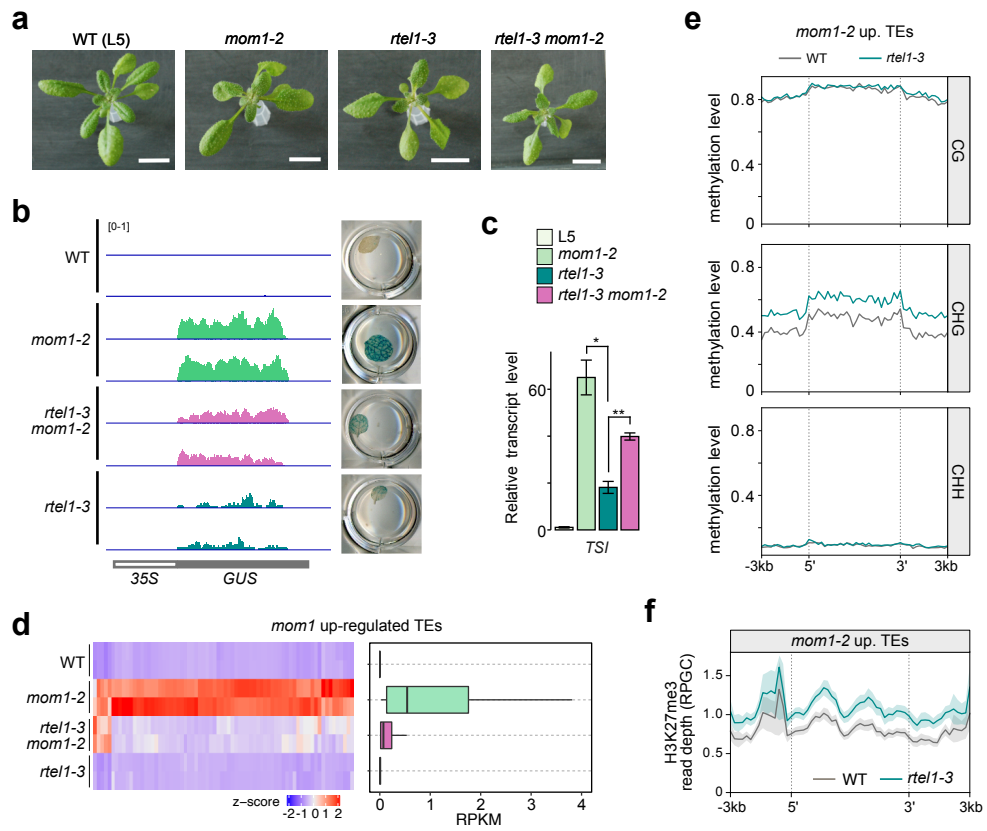

**Figure 5**

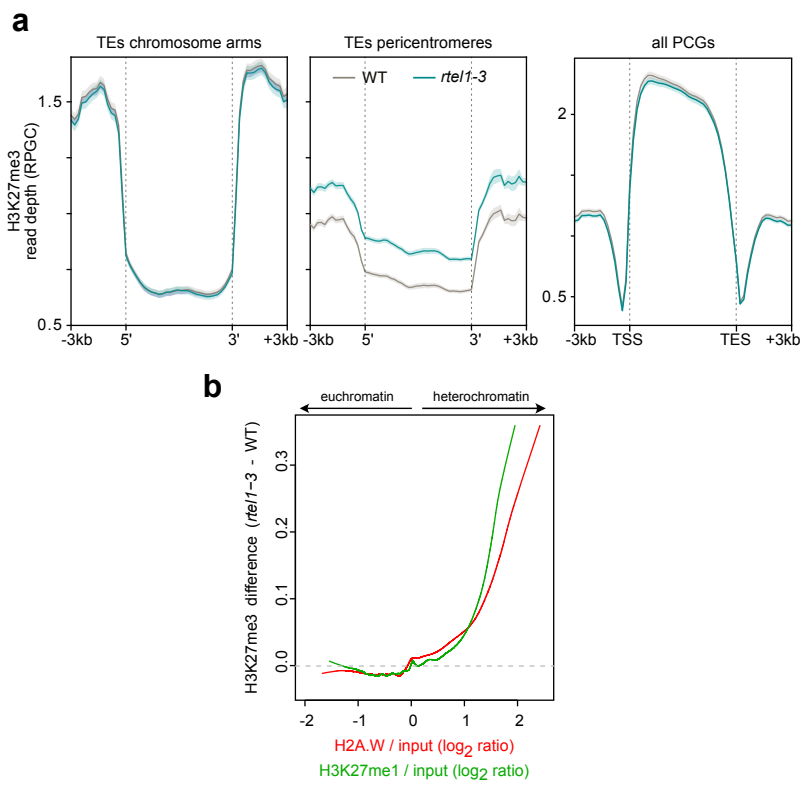

**Figure 6**

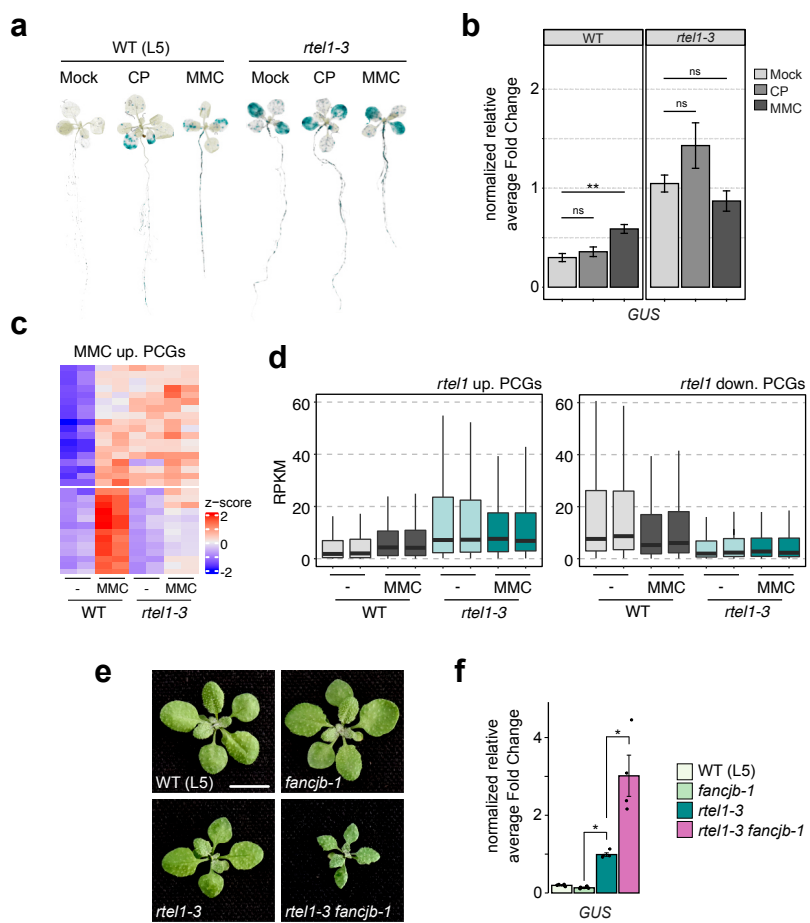

**Figure 7**
